# Supplementary material for: Reliable structural, thermodynamic, and spectroscopic properties of organic molecules adsorbed on silicon surfaces from computational modeling: the case of glycine@Si(100)
Source: Royal Society of Chemistry journal article supplement (doi:10.1039/c1cp21636h), 2011-01-01
Supplement: c1cp21636h.pdf [file c1cp21636h.pdf]

## Supplementary Informations

**Table S1** Main geometrical parameters of the GLY1 isomer of isolated glycine. Semi-Experimental parameters have been reported with the same number of decimals as in the original work [32]. Asterisks indicate data constrained to CCSD(T) values during the fitting procedure.

| Equilibrium parameters |                    |                          |                             |                                 |                                  |                      |
|------------------------|--------------------|--------------------------|-----------------------------|---------------------------------|----------------------------------|----------------------|
| Atom labels            | Double Zeta        |                          | Triple Zeta                 |                                 |                                  | Semi-Exp.            |
|                        | B3LYP/<br>aug-N07D | MP2/<br>DZP <sup>a</sup> | B3LYP/<br>TZ2P <sup>b</sup> | MP2/<br>6-311++G** <sup>c</sup> | CCSD(T)/<br>cc-pVTZ <sup>d</sup> | (Fit 2) <sup>d</sup> |
| bond lengths (Å)       |                    |                          |                             |                                 |                                  |                      |
| N-H2                   | 1.017              | 1.016                    | 1.012                       | 1.014                           | 1.012                            | 1.0065               |
| N-C2                   | 1.450              | 1.455                    | 1.451                       | 1.447                           | 1.446                            | 1.441                |
| C2-H4                  | 1.097              | 1.093                    | 1.091                       | 1.094                           | 1.088                            | 1.0907               |
| C1-C2                  | 1.524              | 1.524                    | 1.522                       | 1.519                           | 1.511                            | 1.511                |
| C1-O1                  | 1.356              | 1.362                    | 1.356                       | 1.356                           | 1.349                            | 1.353                |
| O1-H1                  | 0.971              | 0.973                    | 0.968                       | 0.968                           | 0.966                            | 0.966*               |
| O2-N                   | 2.880              | -                        | 2.867                       | -                               | -                                | -                    |
| C1-O2                  | 1.209              | 1.221                    | 1.204                       | 1.209                           | 1.204                            | 1.207                |
| angles (°)             |                    |                          |                             |                                 |                                  |                      |
| H2-N-H3                | 105.7              | -                        | 105.7                       | 106.2                           | 104.98                           | 104.98*              |
| H2-N-C2                | 110.2              | -                        | 109.9                       | 110.2                           | -                                | -                    |
| N-C2-C1                | 115.9              | 115                      | 115.5                       | 115.6                           | 115.2                            | 115.4                |
| H4-C2-H5               | 105.5              | -                        | 105.6                       | 106.1                           | 105.9                            | 105.95               |
| H4-C2-C1               | 107.5              | -                        | 107.7                       | 107.4                           | -                                | -                    |
| O1-C1-O2               | 122.8              | 123                      | -                           | -                               | 123.1                            | 123.2                |
| C2-C1-O1               | 111.5              | -                        | 111.5                       | 110.9                           | 111.4                            | 111.9                |
| C1-O1-H1               | 107.1              | -                        | 107.1                       | 106.6                           | 106.04                           | 106.04*              |
| C2-C1-O2               | 125.6              | 126                      | 125.7                       | 125.7                           | -                                | -                    |

<sup>a</sup> geometry at MP2/DZP level [31];

<sup>b</sup> Ref [16];

<sup>c</sup> geometries at MP2(full)/6-311++G\*\* level [30];

<sup>d</sup> Ref. [32].

**Table S2** Main geometrical parameters of adsorbed glycine for (a) Si<sub>9</sub>H<sub>12</sub>, (b) Si<sub>15</sub>H<sub>16</sub> and (c) Si<sub>60</sub>H<sub>44</sub> cluster, compared to isolated molecule.

|                      | GLY1  | Adsorbed glycine |           |       |            |
|----------------------|-------|------------------|-----------|-------|------------|
|                      |       | Cluster          | Ads(COOH) | TS    | Ads(COO+H) |
| O1-H1 (Å)            | 0.971 | a                | 1.069     | 1.136 | -          |
|                      |       | b                | 1.045     | 1.176 | -          |
|                      |       | c                | 1.041     | -     | -          |
| Si1-H1 (Å)           | -     | a                | 2.069     | 1.936 | 1.494      |
|                      |       | b                | 2.131     | 1.873 | 1.493      |
|                      |       | c                | 2.147     | -     | 1.493      |
| C1-O1 (Å)            | 1.356 | a                | 1.284     | 1.274 | 1.216      |
|                      |       | b                | 1.289     | 1.269 | 1.216      |
|                      |       | c                | 1.291     | -     | 1.216      |
| C1-O2 (Å)            | 1.209 | a                | 1.266     | 1.276 | 1.343      |
|                      |       | b                | 1.262     | 1.280 | 1.343      |
|                      |       | c                | 1.261     | -     | 1.342      |
| C1-C2 (Å)            | 1.524 | a                | 1.523     | 1.525 | 1.530      |
|                      |       | b                | 1.521     | 1.525 | 1.530      |
|                      |       | c                | 1.522     | -     | 1.531      |
| C2-N (Å)             | 1.450 | a                | 1.444     | 1.445 | 1.452      |
|                      |       | b                | 1.443     | 1.445 | 1.453      |
|                      |       | c                | 1.442     | -     | 1.451      |
| N-H2 (Å)             | 0.017 | a                | 1.015     | 1.015 | 1.016      |
|                      |       | b                | 1.016     | 1.016 | 1.016      |
|                      |       | c                | 1.017     | -     | 1.017      |
| Si2-O2 (Å)           | -     | a                | 1.894     | 1.871 | 1.769      |
|                      |       | b                | 1.898     | 1.857 | 1.768      |
|                      |       | c                | 1.900     | -     | 1.771      |
| Si1-Si2 (Å)          | -     | a                | 2.383     | 2.384 | 2.399      |
|                      |       | b                | 2.389     | 2.387 | 2.394      |
|                      |       | c                | 2.420     | -     | 2.422      |
| Si5-H2               | -     | a                | -         | -     | -          |
|                      |       | b                | -         | -     | -          |
|                      |       | c                | 3.248     | -     | 3.481      |
| θ O1-C1-O2  (°)      | 122.8 | a                | 125.7     | 125.9 | 122.6      |
|                      |       | b                | 125.5     | 125.8 | 122.9      |
|                      |       | c                | 125.2     | -     | 122.8      |
| φ Si1-Si2-O2-C1  (°) | -     | a                | 0.0       | 0.0   | 58.6       |
|                      |       | b                | 7.4       | 6.2   | 50.4       |
|                      |       | c                | 3.8       | -     | 52.6       |
| φ O2-C1-C2-N  (°)    | 0.0   | a                | 0.0       | 0.0   | 8.2        |
|                      |       | b                | 5.8       | 4.3   | 13.7       |
|                      |       | c                | 19.4      | -     | 6.1        |
